# Supplementary material for: A novel anti-CD146 antibody specifically targets cancer cells by internalizing the molecule
Source: PubMed Central journal article supplement (PMC5762510; doi:10.18632/oncotarget.22736), 2017-11-28
Supplement: oncotarget-08-112283-s001.pdf [file oncotarget-08-112283-s001.pdf]

## A novel anti-CD146 antibody specifically targets cancer cells by internalizing the molecule

### SUPPLEMENTARY MATERIALS

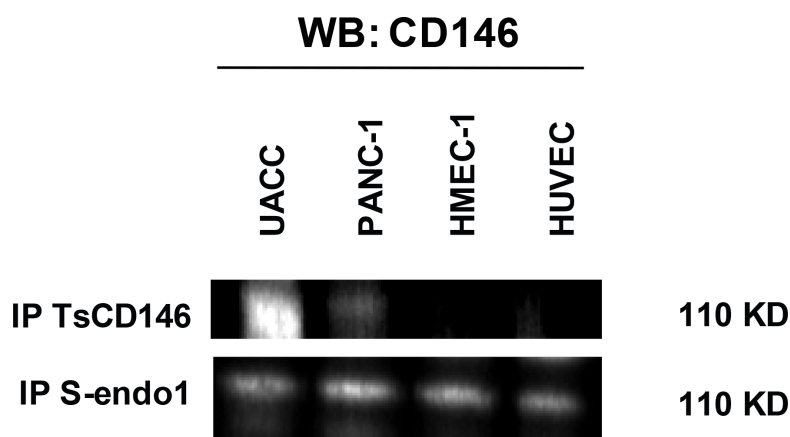

**Supplementary Figure 1: Immunoprecipitation of CD146 in endothelial and cancer cells with TsCD146 mAb.** CD146 was immunoprecipitated in lysates of UACC, Panc-1, HUVEC and HMEC-1 with TsCD146 or S-Endo1 mAbs and revealed by western-blot with COM7A4 antibody. The molecular weight of the protein is shown. The picture is representative of three independent experiments.

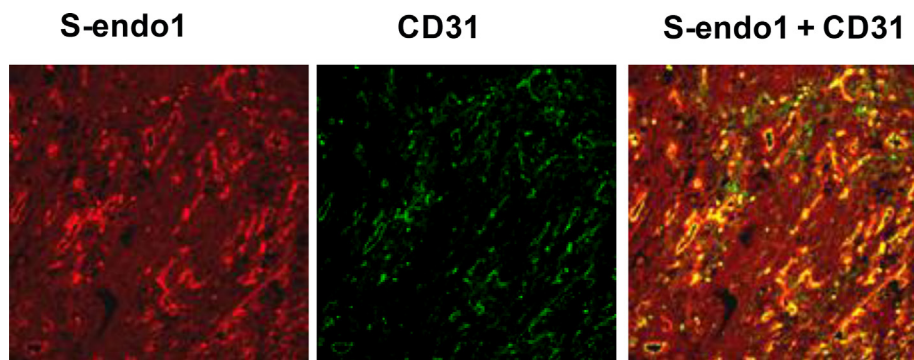

**Supplementary Figure 2: Immunodetection of CD146 in cancer cells with S-endo1 mAb in human biopsies.** Human renal carcinoma biopsies were labeled with the S-endo1 mAb coupled to an Alexa 546 anti-mouse antibody and analyzed by immunofluorescence. CD31 mAb coupled to an alexa 488 anti-rabbit antibody was also used and merge pictures are given. This experiment is representative of 3 independent experiments (magnification 40x).

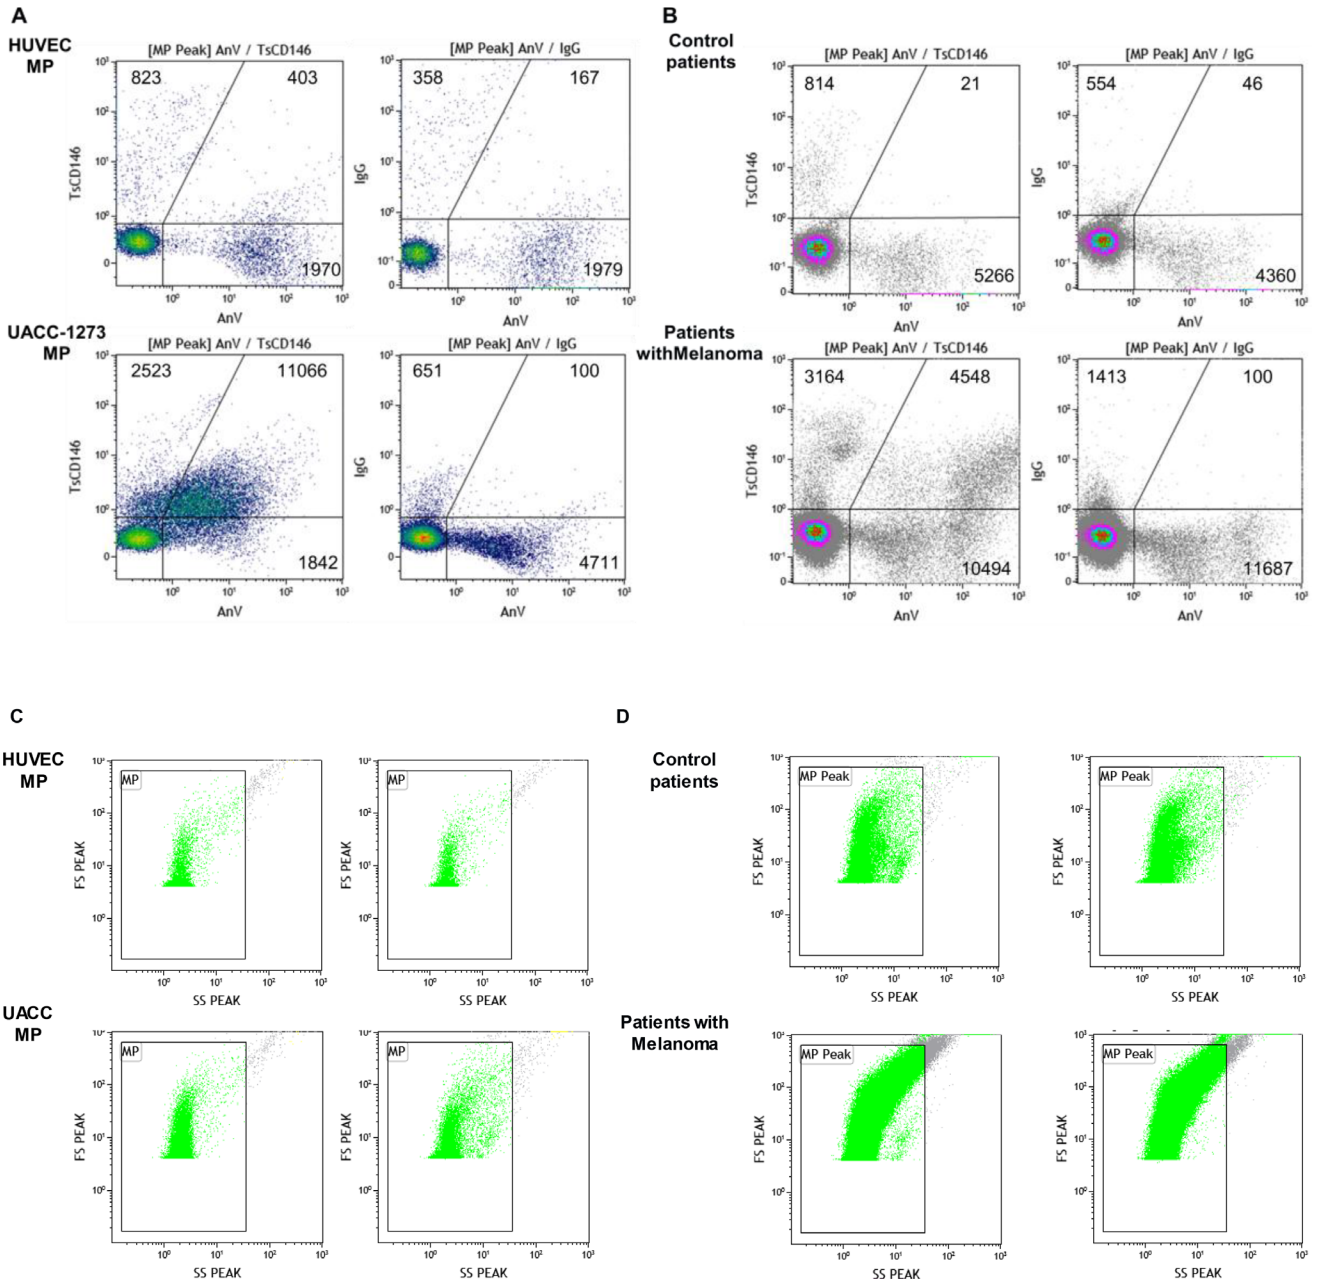

**Supplementary Figure 3: Immunodetection with TsCD146 mAb of CD146 in microparticles secreted by cancer and endothelial cells and in plasma samples from control patients and patients with melanoma. (A)** Annexin V-positive microparticles from HUVEC and UACC-1273 cells were analyzed by flow cytometry with TsCD146 mAb-PE and IgG1-PE control antibody. Images are representative of at least 4 different experiments. **(B)** Annexin V-positive microparticles from plasma samples from control patients or patient with melanoma were analyzed by flow cytometry with TsCD146 mAb-PE. Experiments were also performed with control IgG1-PE. **(C–D)** Side scatter and forward scatter are given for MP derived from cells in culture (C) and plasma samples from patients (D).

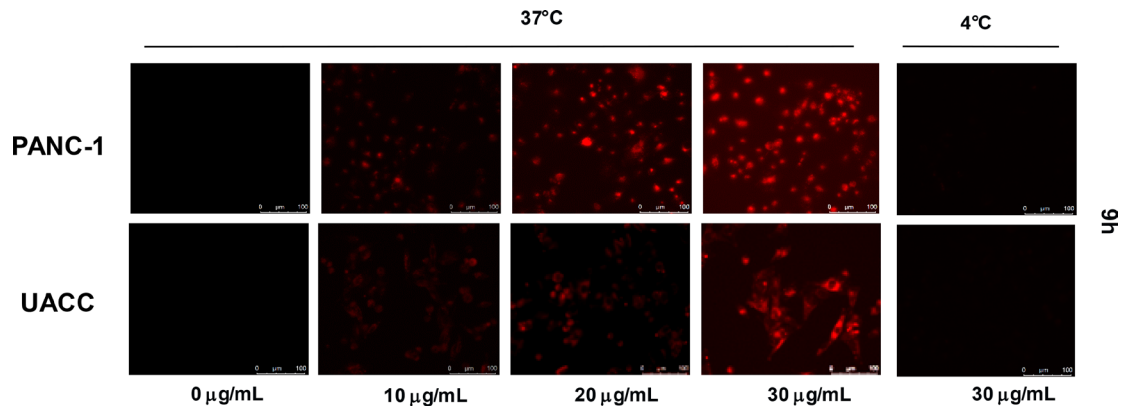

**Supplementary Figure 4: Internalization of TsCD146 mAb in Panc-1 cells.** Visualization of TsCD146 mAb internalization in Panc-1 and UACC cells. Cells were seeded and incubated for 1 to 9 hours at 37°C with 10–30 μg/ml TsCD146 mAb conjugated to Protonex red 600 SE. Fluorescence intensity of the signal was visualized with a fluorescence microscope. As a control, experiments were also performed at 4°C for 9 hours with 30 μg/ml of the complex. The results are representative of 4 independent experiments.

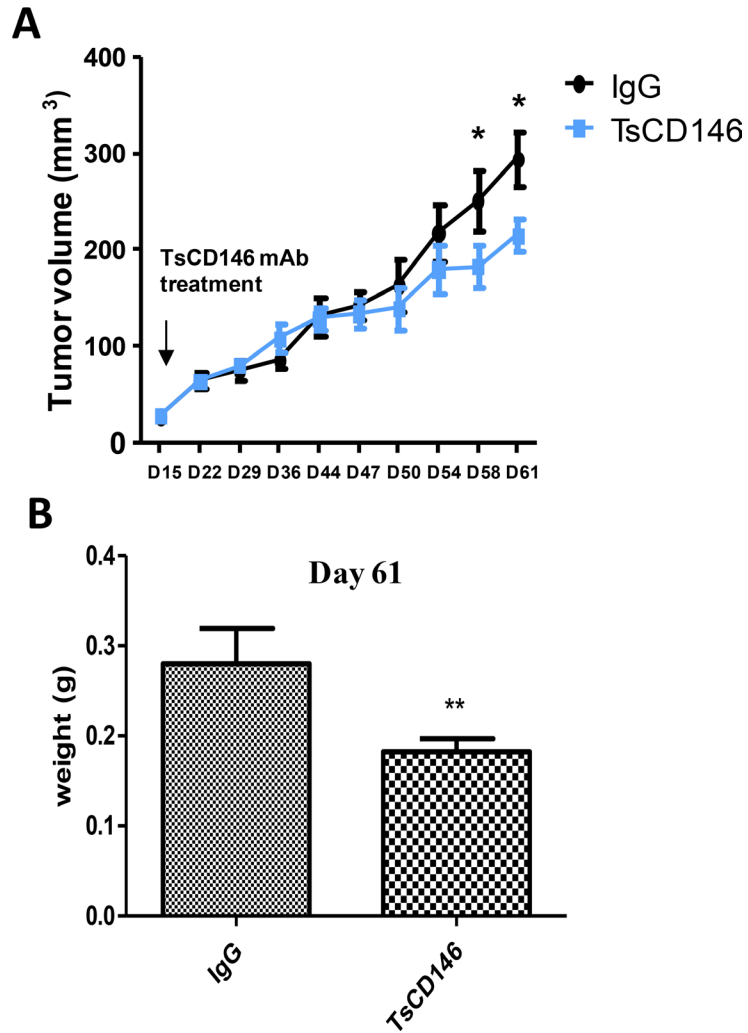

**Supplementary Figure 5: Effect of TsCD146 mAb on growth of Panc-1 cells in an animal model of xenograft.** 8 NOD/SCID mice xenografted with Panc-1 cells were treated for 46 days with control IgG or the TsCD146 mAb. Tumor volume was determined with a caliper (A) and tumor weight was measured at day 61, after euthanasia of the animals (B). Mean values  $\pm$  SEM are given. \*\*\* $p < 0.05$ ,  $p < 0.01$ , experimental versus control.
